# Supplementary material for: Functional diversification of the RING finger and other binuclear treble clef domains in prokaryotes and the early evolution of the ubiquitin system
Source: Royal Society of Chemistry journal article supplement (doi:10.1039/c1mb05061c), 2011-01-07
Supplement: c1mb05061c.pdf [file c1mb05061c.pdf]

# **Functional diversification of the RING finger and other binuclear treble clef domains in prokaryotes and the early evolution of the ubiquitin system**

**A. Maxwell Burroughs<sup>1</sup>, Lakshminarayan M. Iyer<sup>2</sup>, L. Aravind<sup>\*2</sup>**

<sup>1</sup> Omics Science Center (OSC), RIKEN Yokohama Institute, 1-7-22 Suehiro-cho, Tsurumi-ku, Yokohama-shi, 230-0045 Kanagawa, Japan of America

<sup>2</sup> National Center for Biotechnology Information, National Library of Medicine, National Institutes of Health, Bethesda, MD 20894, United States \* Corresponding author. E-mail address: aravind@mail.nih.gov; Tel.: +1-301-594-2445;

Supplementary Information for this article can be viewed at:

[ftp://ftp.ncbi.nih.gov/pub/aravind/PROKRING/prok\\_rings\\_supplementary.html](ftp://ftp.ncbi.nih.gov/pub/aravind/PROKRING/prok_rings_supplementary.html)
